# Supplementary material
Source: PubMed Central journal article supplement (PMC10992520)
Supplement: 262_2021_2948_MOESM1_ESM.pdf [file 262_2021_2948_MOESM1_ESM.pdf]

# Supplementary Figure 1

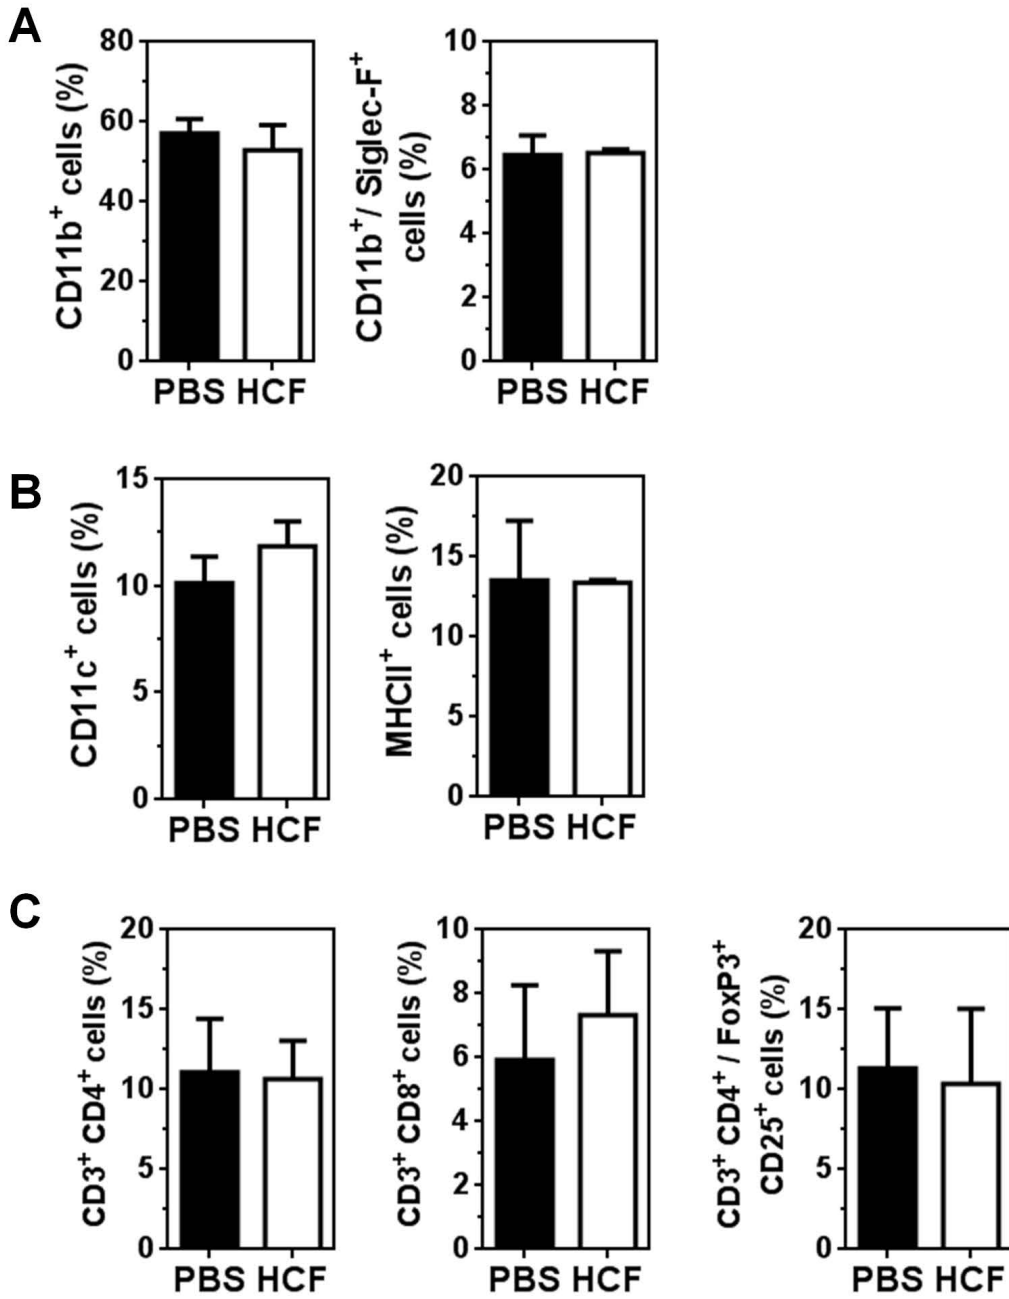

**Supplementary Figure 1. Analyses of the tumor microenvironment in HCF-vaccinated animals**

C57BL/6 mice were vaccinated three times at two week-intervals with human HCF or PBS in alum before LL/2 cells challenge (100,000 cells/mouse). Tumor growth was measured regularly using a caliper. Tumor volume ( $\text{mm}^3$ ) was calculated according to the following formula:  $\frac{4}{3} \times \pi \times r1 \times r2 \times r3$ . At day 17 animals were sacrificed and tumors were removed. Then, tumor cells were stained with anti-CD11b, -Siglec-F, -CD11c, -MHCII, -CD3, -CD4, -CD8, -CD25 and -FoxP3 antibodies and analyzed by flow cytometry. (A) Frequency of CD11b<sup>+</sup> and CD11b<sup>+</sup>/Siglec-F<sup>+</sup> cells. (B) Frequency of CD11c<sup>+</sup> and MHCII<sup>+</sup> cells. (I) Frequency of CD3<sup>+</sup> CD4<sup>+</sup>, CD3<sup>+</sup> CD8<sup>+</sup> and CD3<sup>+</sup> CD4<sup>+</sup>/CD25<sup>+</sup> Foxp3<sup>+</sup> cells.
